# Supplementary material for: Superior CO2 adsorption from waste coffee ground derived carbons
Source: Royal Society of Chemistry journal article supplement (doi:10.1039/c4ra13026j), 2015-01-01
Supplement: c4ra13026j1.pdf [file c4ra13026j1.pdf]

## Superior Post-Combustion CO<sub>2</sub> Adsorption from Waste Coffee Ground Derived Carbons

Will Travis, Srinivas Gadipelli and ZhengXiao Guo\*

Department of Chemistry, University College London, 20 Gordon Street, London, WC1H 0AJ, UK.

\*Email: z.x.guo@ucl.ac.uk

Supporting Information

Table S1. CO<sub>2</sub> uptake capacities for leading porous solid sorbents

| Material           | CO <sub>2</sub> Uptake*<br>(mmol/g) | Methodology                                                 | Reference |
|--------------------|-------------------------------------|-------------------------------------------------------------|-----------|
| Mg-MOF-74          | 6.2                                 | Metal Organic Frameworks (MOFs)                             | 1         |
| Co-MOF-74          | 5.6                                 |                                                             | 1         |
| Ni-MOF-74          | 5.4                                 |                                                             | 1         |
| Zn-MOF-74          | 4.0                                 |                                                             | 2         |
| HKUST-1            | 4.2                                 |                                                             | 3         |
| CuTATB-60          | 3.6                                 |                                                             | 4         |
| TiC-CDC            | 4.1                                 | Synthesised from Titanium carbide powder                    | 5         |
| IBN9-NC1-A         | 4.5                                 | Hard-template approach using a sacrificial zeolite template | 6         |
| KNC-A-K            | 4.0                                 |                                                             | 7         |
| YTC7               | 2.4                                 |                                                             | 8         |
| ATS-4-700          | 3.4                                 |                                                             | 9         |
| CHEM750            | 4.4                                 |                                                             | 10        |
| ACM-5              | 5.1                                 | Polymer synthesised for carbon precursor                    | 11        |
| ACM-3              | 4.3                                 |                                                             | 11        |
| K-PAF-1-750        | 4.2                                 |                                                             | 12        |
| CCI-30             | 3.5                                 |                                                             | 13        |
| CS-6-CD-4          | 4.5                                 |                                                             | 14        |
| AC-750-0.5         | 4.3                                 |                                                             | 15        |
| STC-R-500-A        | 4.4                                 |                                                             | 16        |
| PAN-PK             | 4.4                                 |                                                             | 17        |
| 600-2              | 4.8                                 |                                                             | 18        |
| NPC-650            | 3.1                                 | 19                                                          |           |
| AG-2-700           | 4.5                                 | Naturally existing biomass and waste materials              | 20        |
| AS-2-600           | 4.8                                 |                                                             | 21        |
| CG-400-2           | 4.2                                 |                                                             | This work |
| CG-700-2           | 4.4                                 |                                                             | This work |
| a-CL               | 4.3                                 |                                                             | 22        |
| PA-400-KOH-2-600   | 4.2                                 |                                                             | 23        |
| AC-2-635           | 3.8                                 |                                                             | 24        |
| AC-1               | 2.9                                 | Activated Carbons                                           | 25        |
| Norit R1           | 2.1                                 |                                                             | 26        |
| Maxsorb            | 1.9                                 |                                                             | 27        |
| Activated Carbon A | 1.9                                 |                                                             | 26        |
| BPL                | 2.1                                 |                                                             | 28        |

\*CO<sub>2</sub> uptakes reported at 25 °C and 1 bar, when not directly reported, the uptake values have been taken from adsorption isotherms in the corresponding reference.

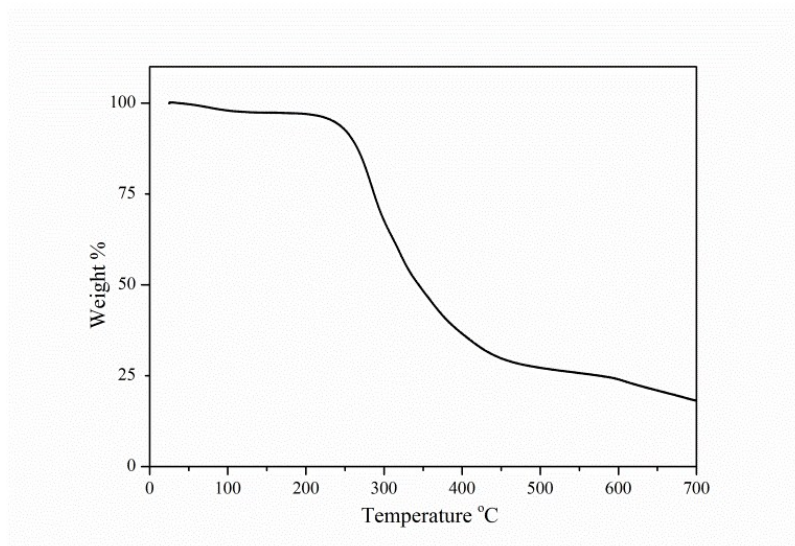

Figure S1. Thermogravimetric analysis for dried coffee grounds to up to 700 °C. Heating at 2°C/min under Argon.

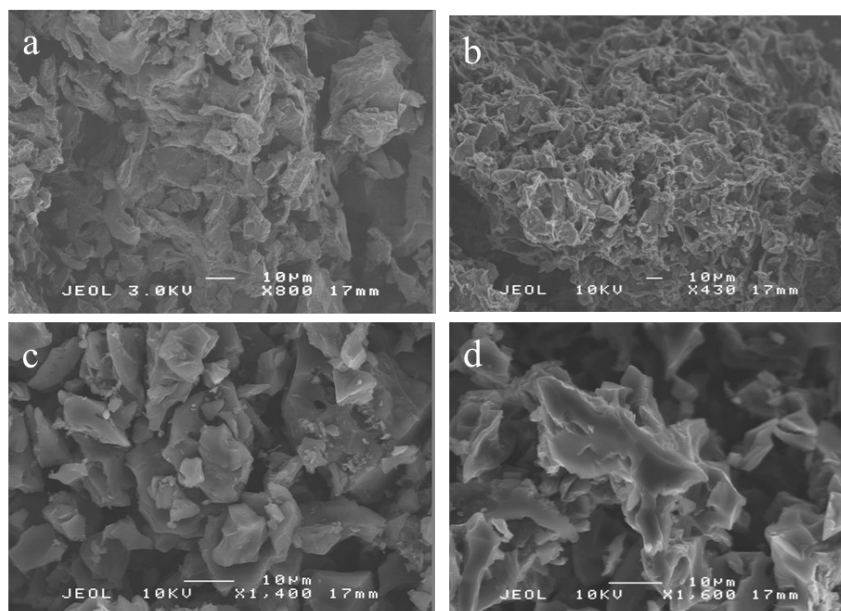

FigureS2.SEM analysis: (a, b) CG char pyrolysed at 400 and 700 °C respectively and (c, d) 4-1 KOH activation for CG 400 and CG 700 respectively.

Table S2. Elemental analysis and yield

| Material   | atomic % <sup>a</sup> |      | Yield<br>(g/100 g CG) |
|------------|-----------------------|------|-----------------------|
|            | C                     | O    |                       |
| CG 400     | 88.3                  | 9.7  | 30.3                  |
| CG 700     | 89.9                  | 7.1  | 26.2                  |
| CG 400 2-1 | 85.1                  | 14.8 | 16.3                  |
| CG 400 4-1 | 86.9                  | 13.0 | 11.8                  |
| CG 700 2-1 | 78.2                  | 20.8 | 14.4                  |
| CG 700 4-1 | 90.8                  | 9.1  | 12.6                  |

<sup>a</sup>atomic % from XPS elemental analysis.

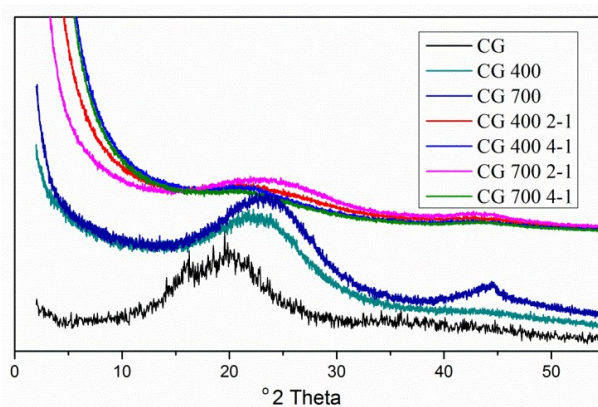

Figure S3. X-Ray Diffraction pattern (XRD) for the Coffee ground starting material, 400 and 700 °C chars and the activated carbon products

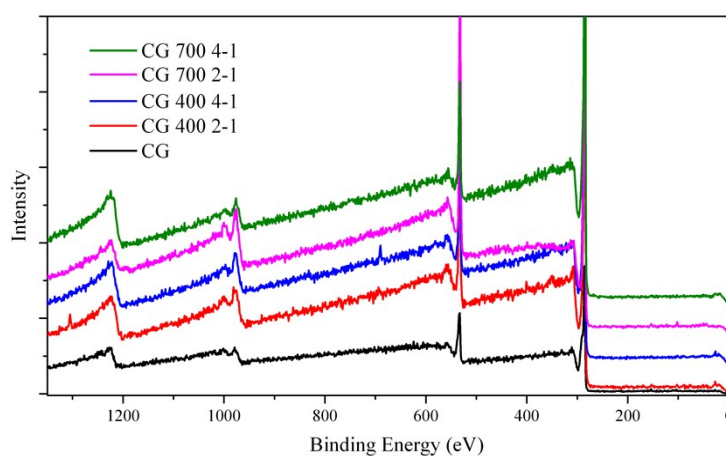

Figure S4. XPS Survey analysis of coffee grounds and the KOH activated Coffee Grounds derived carbon.

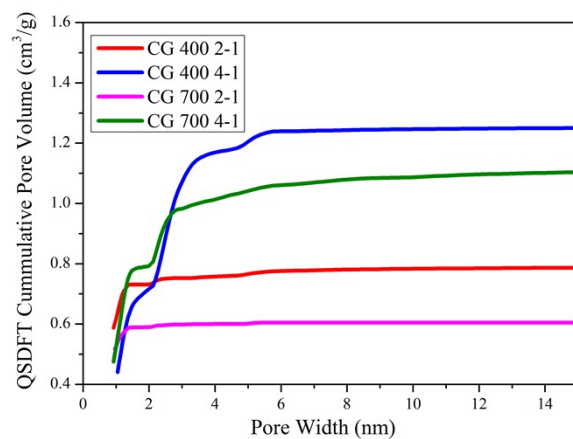

Figure S5. QSDFT Cumulative pore volume for KOH treated Coffee Grounds

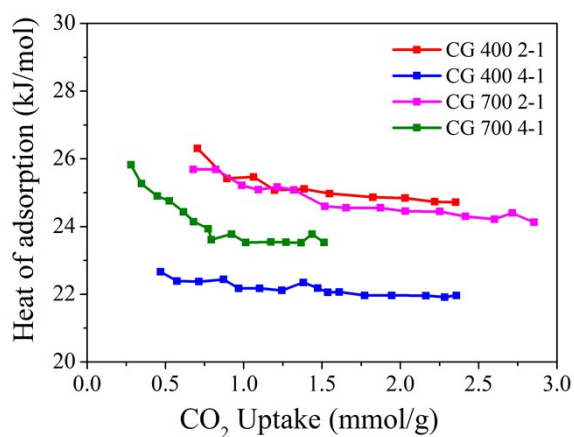

Figure S6. Isothermic heat of adsorption for the activated carbon products

Table S3. CO<sub>2</sub> capture data at 25 °C and 0.15 bar for materials in this work and literature

| Material                                                    | Uptake (mmol/g) | Reference |
|-------------------------------------------------------------|-----------------|-----------|
| CG 700 2-1                                                  | 1.33            | This Work |
| CG 700 4-1                                                  | 1.01            | This Work |
| CG 400 2-1                                                  | 1.06            | This Work |
| CG 400 4-1                                                  | 0.61            | This Work |
| Carbon from bean dreg                                       | 1.20            | 10        |
| AC-750-0.5                                                  | 1.38            | 15        |
| [Zn <sub>2</sub> (bttb)(py-CF <sub>3</sub> ) <sub>2</sub> ] | 0.20            | 29        |
| [Zn <sub>2</sub> (bttb)]                                    | 0.40            | 29        |
| ZIF-8                                                       | 0.09            | 30        |
| ZIF-8 24h@500 °C                                            | 0.40            | 30        |

Table S4. Highest values of CO<sub>2</sub> capture at 50 °C and 1 bar for porous carbons reported in the literature

| Material   | Uptake (mmol/g) | Reference |
|------------|-----------------|-----------|
| CG 700 2-1 | 2.9             | This Work |
| COM-15     | 2.3             | 13        |
| YTC7       | 1.4             | 8         |
| AC-2 365   | 2.6             | 24        |
| ATS-2-700  | 2.1             | 9         |
| AG-2-700   | 2.8             | 20        |
| AS-2-600   | 3.6             | 21        |
| CP-2-800   | 2.1             | 31        |

## References

1. A.O. Yazaydin, R.Q. Snurr, T.H. Park, K. Koh, J. Liu, M.D. LeVan, A.I. Benin, P. Jakubczak, M. Lanuza, D.B. Galloway, J.J. Low and R.R. Willis, *J. Am. Chem. Soc.*, 2009, **131**, 18198
2. A. Millward and O. Yaghi, *J. Am. Chem. Soc.*, 2005, **127**, 17998
3. A. Ö. Yazaydm, A.I Benin, S.A. Faheem, P. Jakubczak, J.J Low, R.R Willis and R.Q.Snurr, *Chem. Mater.*, 2009, **21**, 1425
4. J. Kim, S.T. Yang, S.B. Choi, J. Sim, J. Kim and W.S. Ahn, *J. Mater. Chem.*, 2011, **9**, 3070
5. V. Presser, J. McDonough, S. Yeon and Y. Gogotsi, *Energy Environ. Sci.*, 2011, **4**, 3059
6. Y. Zhao, L. Zhao, K.X. Yao, Y. Yang, Q. Zhang and Y. Han, *J. Mater. Chem.*, 2012, **37**, 19726
7. Y. Zhao, X. Liu, K.X. Yao, L. Zhao and Y. Han, *Chem. Mater.*, 2012, **24**, 4725.
8. J. Zhou, W. Li, Z. Zhang, W. Xing and S. Zhuo, *RSC Adv.*, 2012, **1**, 161
9. M. Sevilla and A.B. Fuertes, *J. Coll. Int. Sci.*, 2012, **366**, 147
10. Y. Xia, R. Mokaya, G.S. Walker and Y. Zhu, *Adv. Energy Mater.*, 2011, **1**, 678
11. M. Nandi, K. Okada, A. Dutta, A. Bhaumik, J. Maruyama, D. Derks and H. Uyama, *ChemCommun.*, 2012, **48**, 10283.
12. Y. Li, T. Ben, B. Zhang, Y. Fu and S. Qiu, *Sci. Rep.* 2013, **3**, 2420.
13. Y. Jin, S.C. Hawkins, C.P Huynh and S. Su, *Energy Environ. Sci.*, 2013, **9**, 2591
14. N.P. Wickramaratne and M. Jaroniec, *ACS. Appl. Mater. Interfaces*, 2013, **5**, 1849
15. Z. Zhang, J. Zhou, W. Xing, Q. Xue, Z. Yan, S. Zhuo, S. Qiao, *Phys. Chem. Chem. Phys.*, 2013, **7**, 2523
16. L.K.C de Souza, N.P. Wickramaratne, A.S. Ello, M.J.F. Costa, C.E.F. de Costa and M. Jaroniec, *Carbon*, 2013, **65**, 334
17. W. Shen, S. Zhang, Y. He, J. Li and W. Fan, *J. Mater. Chem.*, 2011, **36**, 14036
18. D. Lee, C. Zhang, C. Wei, B.L. Ashfeld and H. Gao, *J. Mater. Chem.*, 2013, **47**, 14862
19. J. Wang, I. Senkovska, M. Oschatz, M.R. Lohe, L. Borchardt, A. Heerwig, L. Qian and S. Kaskel, *J. Mater. Chem.*, 2013, **36**, 10951
20. M. Sevilla, F. Camillo, M. Titirici and A. Fuertes, *RSC Adv.*, 2012, **2**, 12792.
21. M. Sevilla and A.B. Fuertes, *Energy. Environ. Sci.*, 2011, **5**, 1765
22. R. Wang, P. Wang, X. Yan, J. Lang, C. Peng and Q. Xue, *ACS Appl. Mater. Interfaces*, 2012, **4**, 5800
23. J. Song, W. Shen, J. Wang and W. Fan, *Carbon*, 2012, **69**, 255
24. X. Fan, L. Zhang, G. Zhang, Z. Shu and J. Shi, *Carbon*, 2013, **61**, 423
25. J.P. Marco-Lozar, J. Juan-Juan, F. Suárez-García, D. Cazorla-Amorós, A. Linares-Solano, *Int. J. Hydrogen.Energ.*, 2012, **37**, 2370
26. S. Himeno, T. Komatsu, and S. Fujita, *J. Chem. Eng. Data.*, 2005, **50**, 369.
27. S. Gadipelli, V. Krungleviciute, Z.X. Guo, T. Yildirim, *Energy. Environ. Sci.*, 2014, **7**, 335

28. E. Kikkinides, R. Yang, S. Cho, *Ind Eng Chem Res.*, 1993, **32**, 271
29. Y.S. Bae, O.K. Farha, J.T. Hupp, R.Q. Snurr. *J. Mater. Chem.*, 2009, **19**, 2131
30. S. Gadipelli, W. Travis, W. Zhou, Z. Guo. *Energy. Environ. Sci.*, 2014, **7**, 2232
31. M. Sevilla, P. Valle-Vignón and A.B. Fuertes, *Adv. Funct. Mater.*, 2011, **21**, 2781
